# Supplementary material
Source: publisher figshare collection journal article supplement (https://acs.figshare.com/ndownloader/files/4688788)
Supplement: Supplementary file 1 [file 4688788]

*Supporting Information*  
*for*  
**LABEL-FREE ELECTRICAL SENSING OF  
SMALL MOLECULE INHIBITION ON TYROSINE  
PHOSPHORYLATION**

---

Kagan Kerman<sup>a,b,\*</sup>, Mun'de Vestergaard<sup>b</sup>

& Eiichi Tamiya<sup>b</sup>

<sup>a</sup>Department of Chemistry, University of Saskatchewan, 110 Science Place,  
Saskatoon, S7N 5C9 Saskatchewan, Canada

<sup>b</sup>School of Materials Science, Japan Advanced Institute of Science and  
Technology, 1-1 Asahidai, Nomi City, Ishikawa 923-1292, Japan

\*Corresponding author:

**e-mail:** [kagan.kerman@usask.ca](mailto:kagan.kerman@usask.ca)

**•Present address:** Department of Applied Physics, Graduate School of  
Engineering, Osaka University, 2-1 Yamadaoka, Suita,  
Osaka, 565-0871, Japan

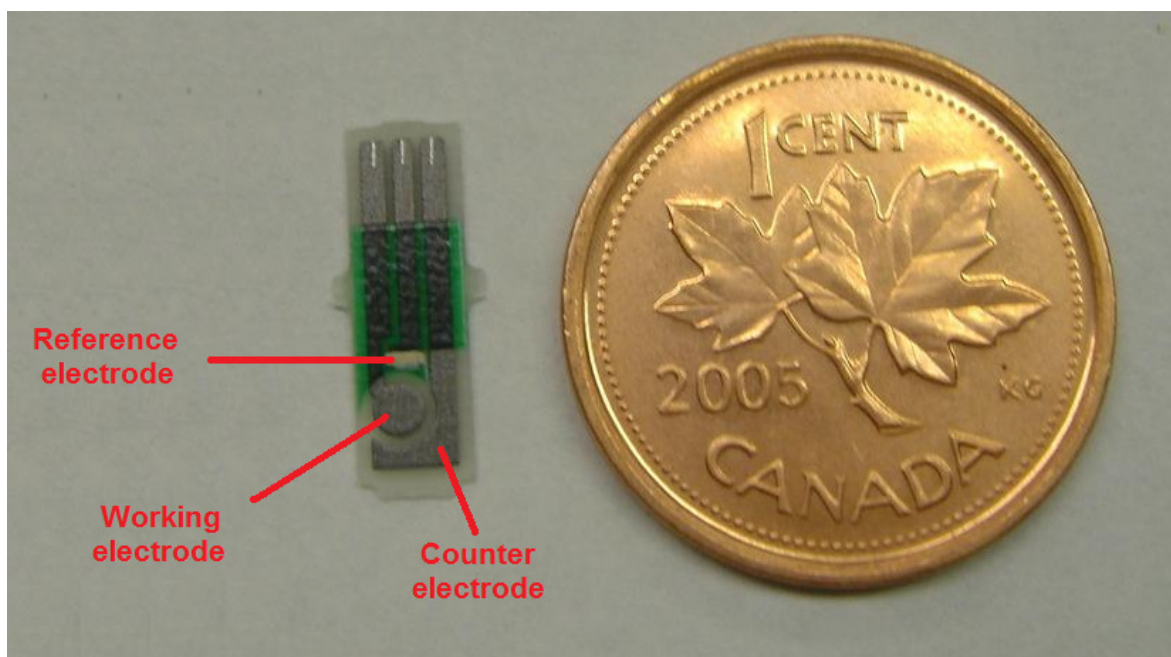

**Supporting Fig. 1.** Screen-printed gold electrode (SPE) with a three-electrode system.

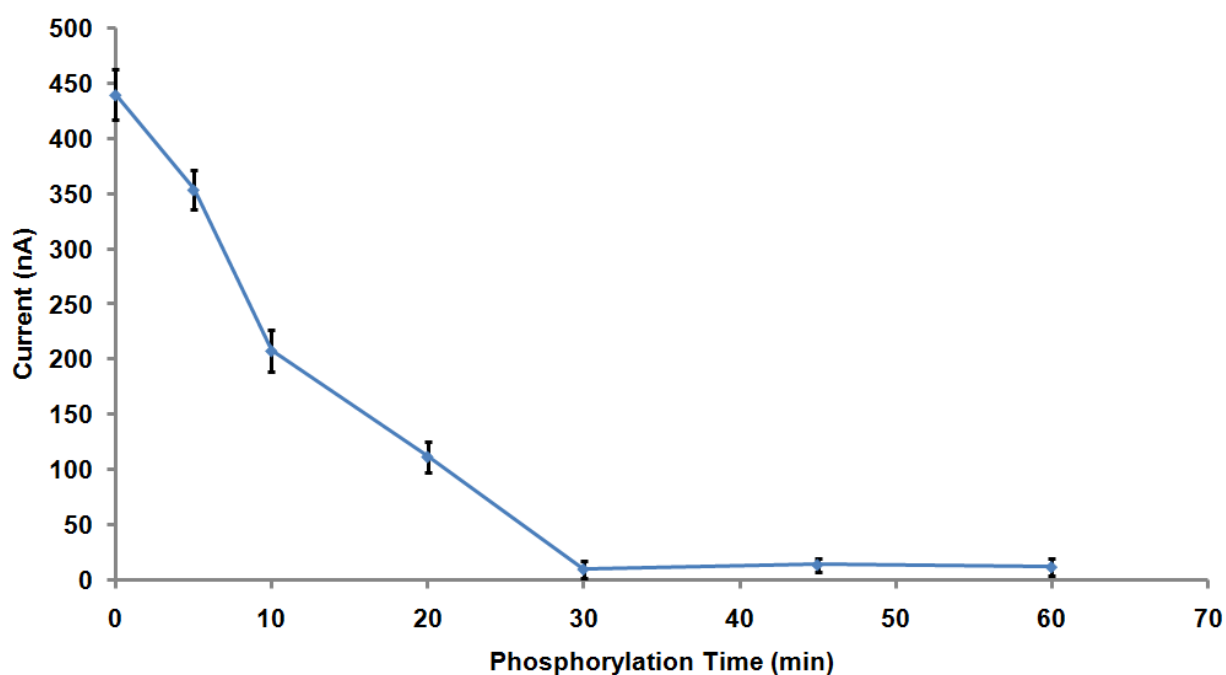

**Supporting Fig. 2.** Plot for the dependence of Tyr oxidation current signals on phosphorylation time in the presence of 200 U/mL p60<sup>c-Src</sup>. Other experimental conditions are as described in the text.

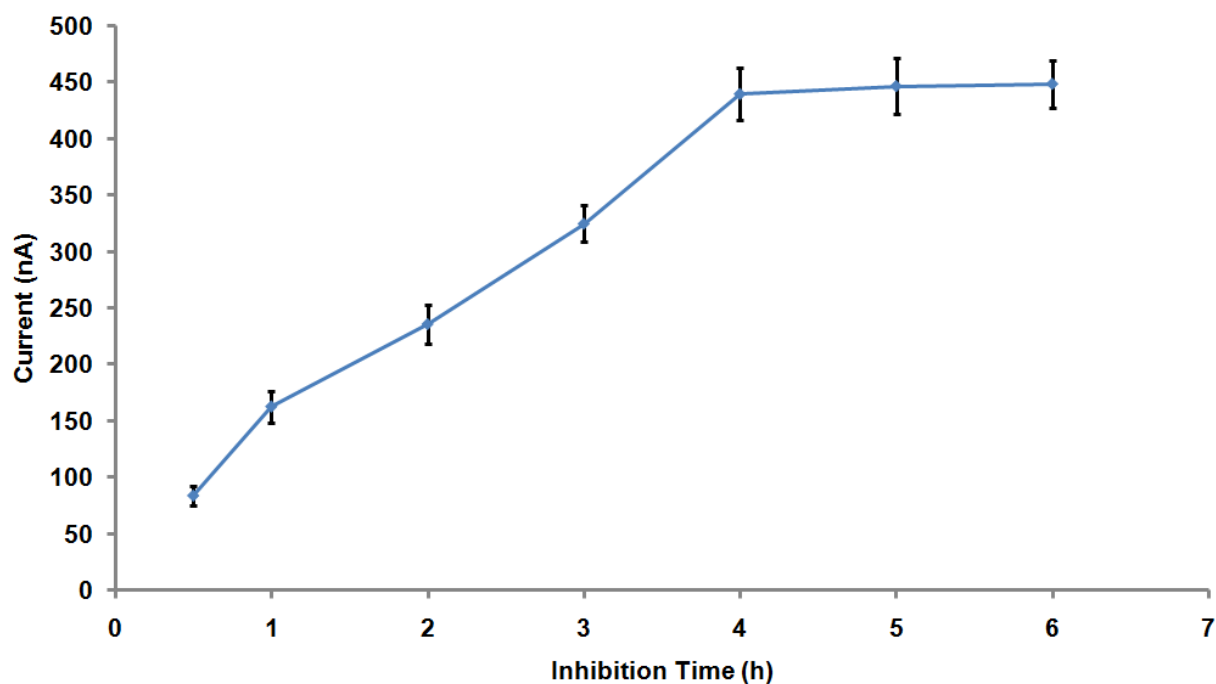

**Supporting Fig. 3.** Plot for the dependence of Tyr oxidation current signals on inhibition time in the presence of 200 U/mL p60<sup>c-Src</sup> and 20 nM PP2. Other experimental conditions are as described in the text.
